# Supplementary material for: Long noncoding RNAs that respond to Fusarium oxysporum infection in ‘Cavendish’ banana (Musa acuminata)
Source: PubMed Central journal article supplement (PMC5717134; doi:10.1038/s41598-017-17179-3), 2017-12-05

**Supplementary materials**

**Long noncoding RNAs that respond to *Fusarium oxysporum*  
infection in ‘Cavendish’ banana (*Musa acuminata*)**

Wenbin Li, Chunqiang Li, Shuxia Li, Ming Peng\*

**Supplementary Fig. S1.** The expression levels of lncRNA with their nearby mRNA genes involved in plant pathogen interaction in banana under *F. oxysporum* infection.

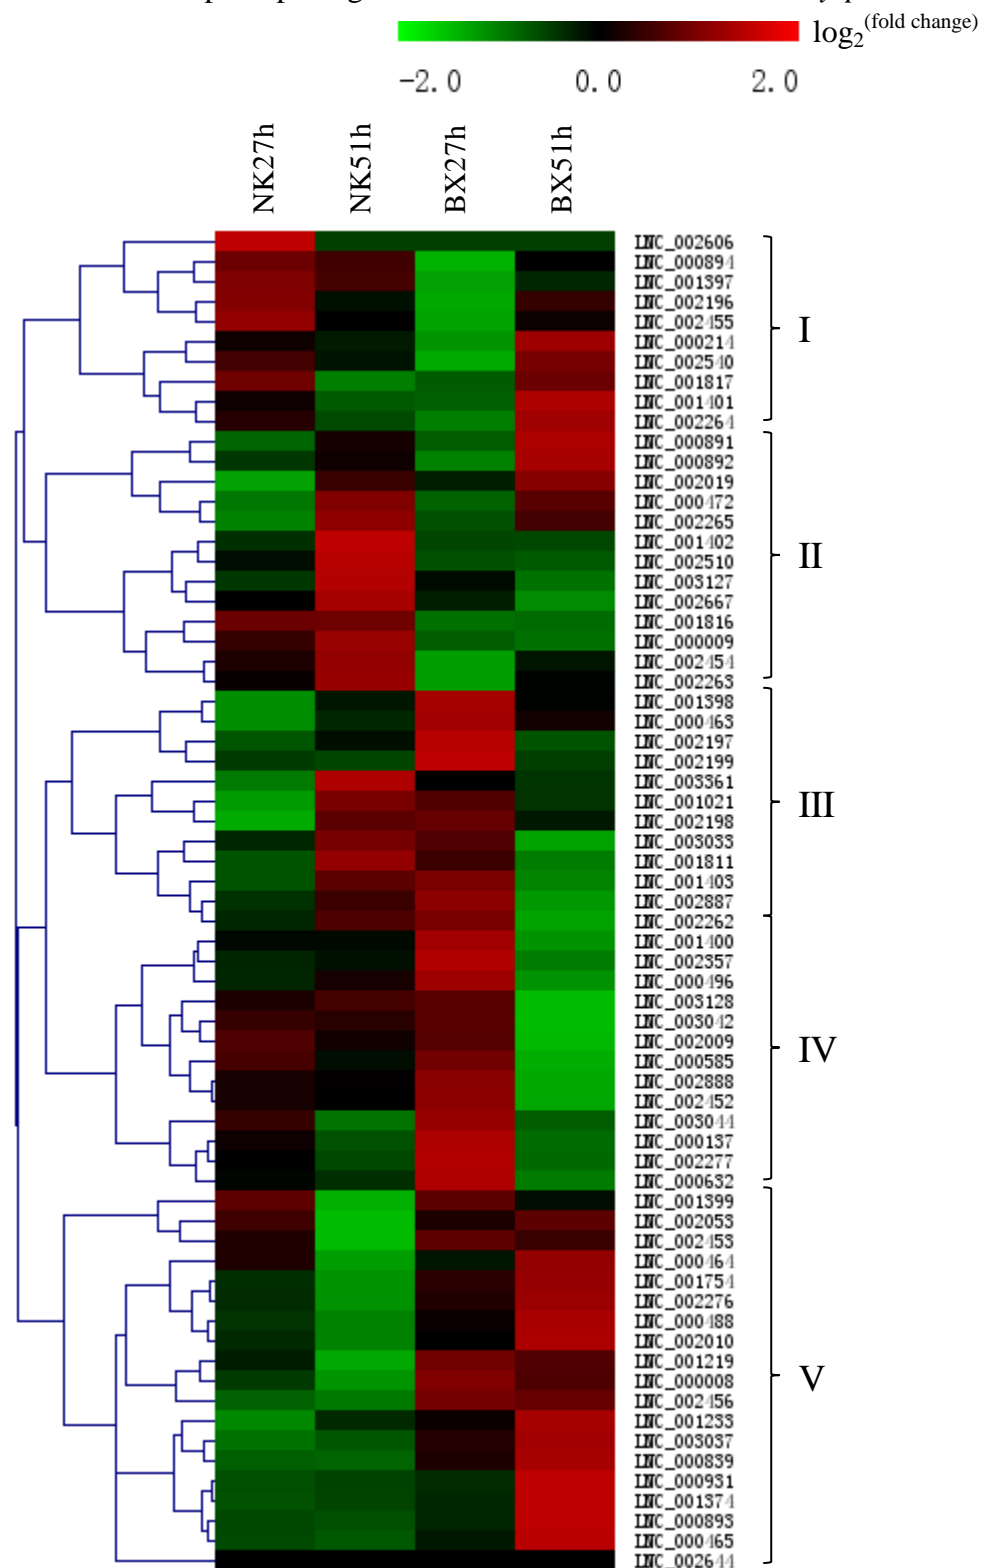

Each rows represents one candidate lncRNA. The expression fold change of the infected over mock-inoculated plant is represented by a color scale ranging from saturated green (-2) to saturated red (2).

**Supplementary Fig. S2.** The expression levels of lncRNA and their high expression co-relationship mRNAs related to plant pathogen interaction in banana at 27 and 51 hours after *F. oxysporum* infection.

The Y axes are the expression fold change of genes in infected plants over the mock-inoculated plants from three biological replicates.

Bars indicate  $\pm$  standard error. The X axes are banana cultivar and inoculation time.

R square value: the correlation between the expression of lncRNA and mRNA genes from the correl function.

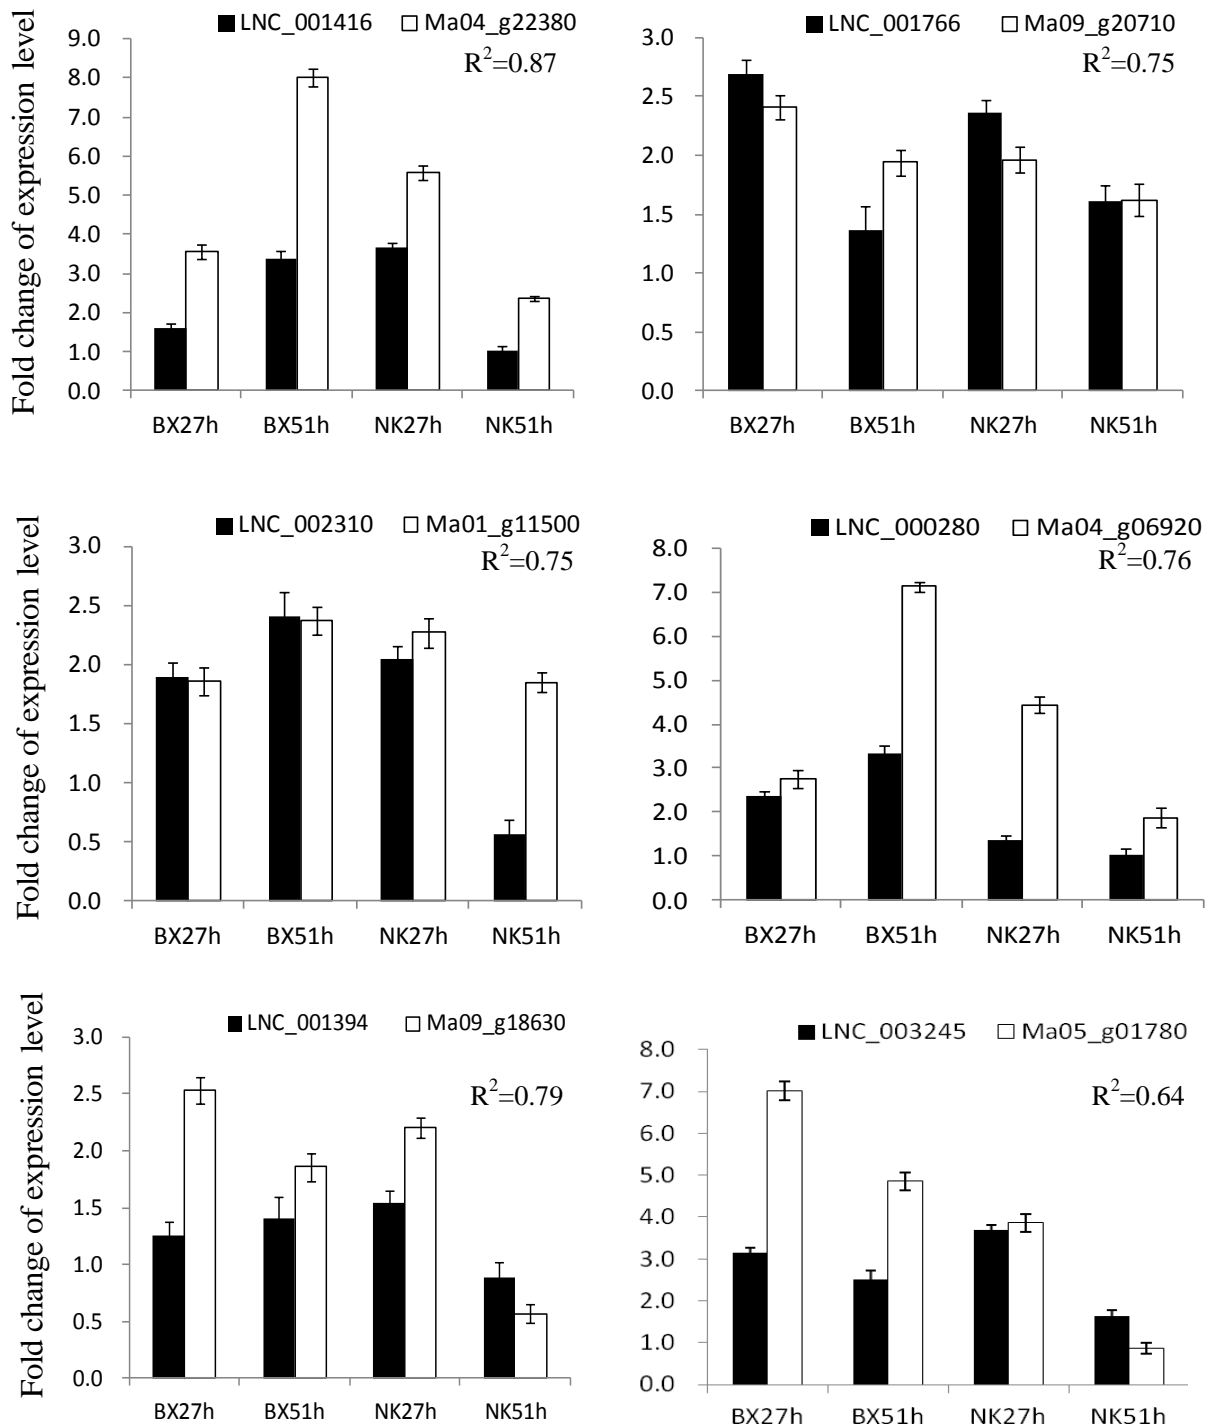

**Supplementary Fig. S3.** The expression levels of lncRNA and their nearby mRNAs related to plant pathogen interaction in banana at 27 and 51 hours after *F. oxysporum* infection.

The Y axes are the expression fold change of genes in infected plants over the mock-inoculated plants from three biological replicates.

Bars indicate  $\pm$  standard error. The X axes are banana cultivar and inoculation time.

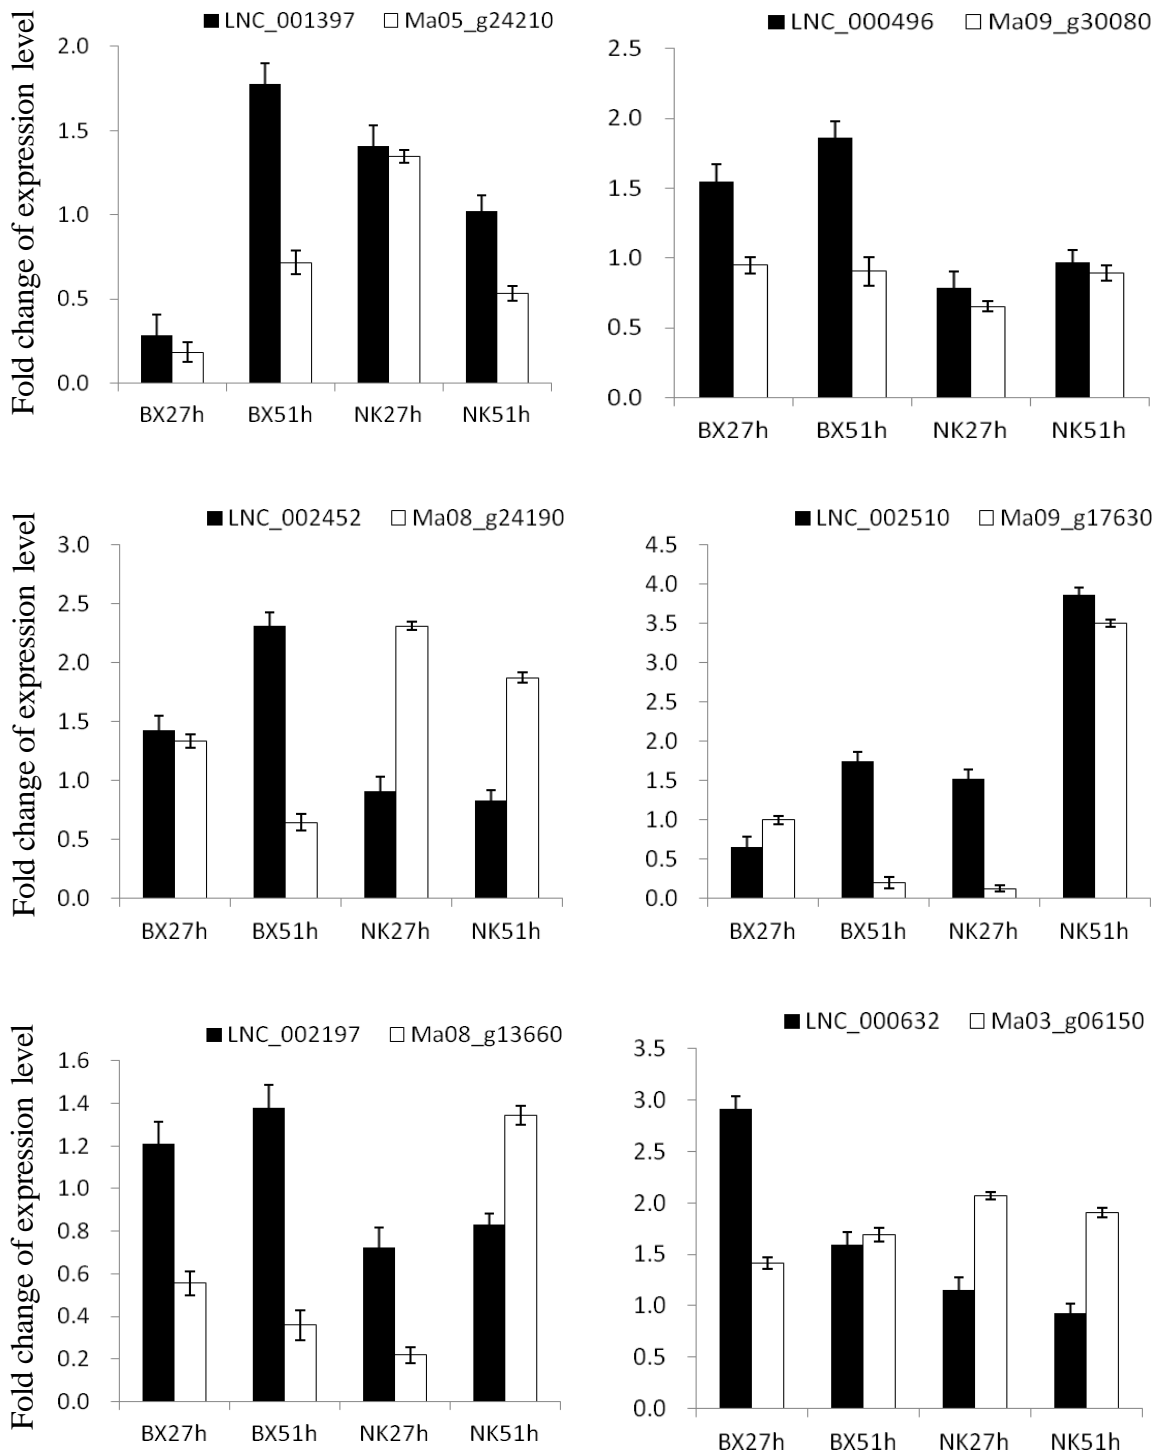

Supplement: 41598_2017_17179_MOESM1_ESM.pdf [file 41598_2017_17179_MOESM1_ESM.pdf]
